# Supplementary material for: MAPLE (modular automated platform for large-scale experiments), a robot for integrated organism-handling and phenotyping
Source: PubMed Central journal article supplement (PMC6193762; doi:10.7554/elife.37166), 2018-08-17
Supplement: elife-37166-supp1.pdf [file elife-37166-supp1.pdf]

| MAPLE Fly-Handling Robot Bill of Materials |             |                          |                      |                                                                   |                                                |          |      |       |                                                                                                                                                                                  |
|--------------------------------------------|-------------|--------------------------|----------------------|-------------------------------------------------------------------|------------------------------------------------|----------|------|-------|----------------------------------------------------------------------------------------------------------------------------------------------------------------------------------|
| Last updated: 12/3/2017                    |             |                          |                      |                                                                   |                                                |          |      |       |                                                                                                                                                                                  |
|                                            | Color code: | Off-the-shelf Customized | 3d-printed Laser cut | Waterjet Machined                                                 |                                                |          |      |       |                                                                                                                                                                                  |
|                                            |             | Alt. source              |                      |                                                                   |                                                |          |      |       |                                                                                                                                                                                  |
| Structural                                 | Qty         | Price                    | Ext. Price           | Source                                                            | Part #                                         | X/Y only | LLT? | Notes | Alternate source                                                                                                                                                                 |
| 40mm sq x 1120mm Extrusion                 | 2           | \$29.90                  | \$59.80              | <a href="http://us.misumi-ec.com">http://us.misumi-ec.com</a>     | HFSB5-4040-1120                                | *        |      |       |                                                                                                                                                                                  |
| 20mm x 40mm x 410mm Extrusion              | 4           | \$6.84                   | \$27.36              | <a href="http://us.misumi-ec.com">http://us.misumi-ec.com</a>     | HFSB5-2040-410                                 | *        |      |       |                                                                                                                                                                                  |
| 20mm x 40mm x 370mm Extrusion              | 2           | \$6.17                   | \$12.34              | <a href="http://us.misumi-ec.com">http://us.misumi-ec.com</a>     | HFSB5-2040-370                                 | *        |      |       |                                                                                                                                                                                  |
| 20mm x 40mm x 1120mm Extrusion             | 2           | \$18.70                  | \$37.40              | <a href="http://us.misumi-ec.com">http://us.misumi-ec.com</a>     | HFSB5-2040-1120                                | *        |      |       |                                                                                                                                                                                  |
| 20mm sq x 370mm Extrusion                  | 2           | \$3.25                   | \$6.50               | <a href="http://us.misumi-ec.com">http://us.misumi-ec.com</a>     | HFSB5-2020-370                                 | *        |      |       |                                                                                                                                                                                  |
| Wide corner bracket                        | 8           | \$3.38                   | \$27.04              | <a href="http://us.misumi-ec.com">http://us.misumi-ec.com</a>     | HBLFSDK5                                       | *        |      |       |                                                                                                                                                                                  |
| Narrow corner bracket                      | 8           | \$2.85                   | \$22.80              | <a href="http://us.misumi-ec.com">http://us.misumi-ec.com</a>     | HBLFSSW5                                       | *        |      |       |                                                                                                                                                                                  |
| Sheet metal brace                          | 8           | \$10.50                  | \$84.00              | <a href="http://us.misumi-ec.com">http://us.misumi-ec.com</a>     | SHPTCUL5-SET                                   | *        |      |       |                                                                                                                                                                                  |
| Spacer stick                               | 1           | \$4.00                   | \$4.00               | <a href="http://tapplastics.com">http://tapplastics.com</a>       | 1/4" thick acrylic sheet, cut from 8" x 2.75"  | *        |      |       |                                                                                                                                                                                  |
| Laser cutting                              |             | varies                   |                      |                                                                   |                                                |          |      |       |                                                                                                                                                                                  |
| End panel                                  | 1           | \$8.00                   | \$8.00               | <a href="http://tapplastics.com">http://tapplastics.com</a>       | 1/4" thick acrylic sheet, cut from 8" x 16"    | *        |      |       |                                                                                                                                                                                  |
| Laser cutting                              |             | varies                   |                      |                                                                   |                                                |          |      |       |                                                                                                                                                                                  |
| Work surface                               | 1           | \$50.00                  | \$50.00              | <a href="http://tapplastics.com">http://tapplastics.com</a>       | 1/4" thick acrylic sheet, cut from 16.5" x 46" | *        |      |       |                                                                                                                                                                                  |
| Laser cutting                              |             | varies                   |                      |                                                                   |                                                |          |      |       |                                                                                                                                                                                  |
|                                            |             | <b>Subtotal:</b>         | <b>\$339.24</b>      |                                                                   |                                                |          |      |       |                                                                                                                                                                                  |
| Motion                                     |             |                          |                      |                                                                   |                                                |          |      |       |                                                                                                                                                                                  |
| Motor bracket                              | 2           | -                        | \$9.19               | <a href="http://OnlineMetals.com">OnlineMetals.com</a>            | 6061-T6 Al, 1/4" thick - 8" x 8"               | *        |      |       |                                                                                                                                                                                  |
| Waterjet cutting / machining               |             | varies                   |                      |                                                                   |                                                |          |      |       | <a href="http://eMachineShop.com">eMachineShop.com</a>                                                                                                                           |
| Idler pulley bracket                       | 2           | -                        |                      | <a href="http://OnlineMetals.com">OnlineMetals.com</a>            | 6061-T6 Al, 1/4" thick - included w/above      | *        |      |       |                                                                                                                                                                                  |
| Waterjet cutting / machining               |             | varies                   |                      |                                                                   |                                                |          |      |       | <a href="http://eMachineShop.com">eMachineShop.com</a>                                                                                                                           |
| NEMA 17 stepper                            | 2           | \$11.50                  | \$23.00              | <a href="http://RobotDigg.com">RobotDigg.com</a>                  | MNEMA17-60                                     | *        | Y    |       | <a href="https://www.amazon.com/Torque-Current-Stepper-Motor-Extruder/dp/B00PNEQP1G/">https://www.amazon.com/Torque-Current-Stepper-Motor-Extruder/dp/B00PNEQP1G/</a>            |
| X axis rail                                | 2           | \$81.30                  | \$162.60             | <a href="http://IGUS.com">IGUS.com</a>                            | AWUM-12 @ 1116mm length                        | *        |      |       |                                                                                                                                                                                  |
| X axis bearing                             | 4           | \$51.93                  | \$207.72             | <a href="http://IGUS.com">IGUS.com</a>                            | OJUM-06-12                                     | *        |      |       |                                                                                                                                                                                  |
| Drilling & tapping                         |             |                          |                      |                                                                   |                                                |          |      |       |                                                                                                                                                                                  |
| Y axis                                     | 1           | \$49.37                  | \$49.37              | <a href="http://IGUS.com">IGUS.com</a>                            | WS-10-120 @ 453mm length                       | *        |      |       |                                                                                                                                                                                  |
| Drilling & tapping                         |             |                          |                      |                                                                   |                                                |          |      |       |                                                                                                                                                                                  |
| Y upper plate                              | 1           | -                        | \$34.56              | <a href="http://OnlineMetals.com">OnlineMetals.com</a>            | 6061-T6 Al, 1/8" thick - 12" x 18"             | *        |      |       |                                                                                                                                                                                  |
| Waterjet cutting / machining               |             | varies                   |                      |                                                                   |                                                |          |      |       | <a href="http://eMachineShop.com">eMachineShop.com</a>                                                                                                                           |
| Y lower plate                              | 1           | -                        | \$12.16              | <a href="http://OnlineMetals.com">OnlineMetals.com</a>            | 6061-T6 Al, 3/16" thick - 8" x 8"              | *        |      |       |                                                                                                                                                                                  |
| Waterjet cutting / machining               |             | varies                   |                      |                                                                   |                                                |          |      |       | <a href="http://eMachineShop.com">eMachineShop.com</a>                                                                                                                           |
| Y bearings                                 | 4           | \$5.25                   | \$21.00              | <a href="http://IGUS.com">IGUS.com</a>                            | WJ200UM-01-10                                  | *        |      |       |                                                                                                                                                                                  |
| Belt clamp                                 | 2           |                          | \$0.00               | 3d printed                                                        |                                                | *        |      |       | <a href="http://Shapeways.com">Shapeways.com</a>                                                                                                                                 |
| Belt tensioner                             | 2           |                          | \$0.00               | 3d printed                                                        |                                                | *        |      |       | <a href="http://Shapeways.com">Shapeways.com</a>                                                                                                                                 |
| X axis limit switch holder                 | 1           |                          | \$0.00               | 3d printed                                                        |                                                | *        |      |       | <a href="http://Shapeways.com">Shapeways.com</a>                                                                                                                                 |
| Pulley, motor                              | 2           | \$1.80                   | \$3.60               | <a href="http://RobotDigg.com">RobotDigg.com</a>                  | GT2-20T-5B-6                                   | *        | Y    |       | <a href="https://www.amazon.com/Qunqi-Aluminum-Timing-Pulley-Printer/dp/B011MR6OR0/">https://www.amazon.com/Qunqi-Aluminum-Timing-Pulley-Printer/dp/B011MR6OR0/</a>              |
| Pulley, idler                              | 8           | \$1.80                   | \$14.40              | <a href="http://RobotDigg.com">RobotDigg.com</a>                  | GT2-20T-8B-6                                   | *        | Y    |       | 2x <a href="https://www.amazon.com/CycleMore-Aluminum-Pulleys-Printer-Reprap/dp/B016ZRJGBK/">https://www.amazon.com/CycleMore-Aluminum-Pulleys-Printer-Reprap/dp/B016ZRJGBK/</a> |
| Idler bearing                              | 8           | \$2.00                   | \$16.00              | <a href="http://McMaster.com">McMaster.com</a>                    | 6679K11                                        | *        |      |       |                                                                                                                                                                                  |
| Z axis plate                               | 1           | -                        |                      | <a href="http://OnlineMetals.com">OnlineMetals.com</a>            | 6061-T6 Al, 1/8" thick - included w/above      | *        |      |       |                                                                                                                                                                                  |
| Waterjet cutting / machining               |             | varies                   |                      |                                                                   |                                                |          |      |       | <a href="http://eMachineShop.com">eMachineShop.com</a>                                                                                                                           |
| T brackets                                 | 1           | -                        | \$20.16              | <a href="http://OnlineMetals.com">OnlineMetals.com</a>            | 6061-T6 Al, 3/8" thick - 6" x 12"              | *        |      |       |                                                                                                                                                                                  |
| Waterjet cutting / machining               |             | varies                   |                      |                                                                   |                                                |          |      |       | <a href="http://eMachineShop.com">eMachineShop.com</a>                                                                                                                           |
| Drag chain plate                           | 1           | -                        |                      | <a href="http://OnlineMetals.com">OnlineMetals.com</a>            | 6061-T6 Al, 1/8" thick - included w/above      | *        |      |       | <a href="http://eMachineShop.com">eMachineShop.com</a>                                                                                                                           |
| Waterjet cutting / machining               |             | varies                   |                      |                                                                   |                                                |          |      |       | <a href="http://eMachineShop.com">eMachineShop.com</a>                                                                                                                           |
| X axis drag chain                          | 6           | \$16.05                  | \$96.30              | <a href="http://McMaster.com">McMaster.com</a>                    | 4516T48 (6' total)                             | *        |      |       |                                                                                                                                                                                  |
| Y axis drag chain                          | 2           | \$12.47                  | \$24.94              | <a href="http://McMaster.com">McMaster.com</a>                    | 4516T46 (2' total)                             | *        |      |       |                                                                                                                                                                                  |
| Y axis drag chain mount                    | 1           |                          | \$0.00               |                                                                   |                                                | *        |      |       | <a href="http://Shapeways.com">Shapeways.com</a>                                                                                                                                 |
| GT2 belt                                   | 1           | \$15.00                  | \$15.00              | <a href="http://RobotDigg.com">RobotDigg.com</a>                  | GT2-6-OPEN_10Meters                            | *        | Y    |       | 2x <a href="https://www.amazon.com/Meters-pitch-wide-Timing-printer/dp/B00F2IQNX8/">https://www.amazon.com/Meters-pitch-wide-Timing-printer/dp/B00F2IQNX8/</a>                   |
| Z slides                                   | 3           | \$317.20                 | \$951.60             | <a href="http://IGUS.com">IGUS.com</a>                            | SLN-D740679-2                                  | *        | Y    |       |                                                                                                                                                                                  |
| Z mount                                    | 3           | -                        |                      | <a href="http://OnlineMetals.com">OnlineMetals.com</a>            | 6061-T6 Al, 1/8" thick - included w/above      | *        |      |       | <a href="http://eMachineShop.com">eMachineShop.com</a>                                                                                                                           |
| Waterjet cutting / machining               |             | varies                   |                      |                                                                   |                                                |          |      |       | <a href="http://eMachineShop.com">eMachineShop.com</a>                                                                                                                           |
| 4mm spacer                                 | 10          | \$1.25                   | \$12.50              | <a href="http://McMaster.com">McMaster.com</a>                    | 93657A404                                      | *        |      |       |                                                                                                                                                                                  |
| 2mm spacer                                 | 6           | \$1.36                   | \$8.16               | <a href="http://McMaster.com">McMaster.com</a>                    | 93657A402                                      | *        |      |       |                                                                                                                                                                                  |
| 1/4" spacer                                | 4           | \$8.72                   | \$34.88              | <a href="http://McMaster.com">McMaster.com</a>                    | 94639A569                                      | *        |      |       |                                                                                                                                                                                  |
| Shoulder bolt, Y carriage, 25mm            | 4           | \$5.82                   | \$23.28              | <a href="http://McMaster.com">McMaster.com</a>                    | 90265A145                                      | *        |      |       |                                                                                                                                                                                  |
| Shoulder bolt, idler pulleys               | 4           | \$5.49                   | \$21.96              | <a href="http://McMaster.com">McMaster.com</a>                    | 90265A144                                      | *        |      |       |                                                                                                                                                                                  |
|                                            |             | <b>Subtotal:</b>         | <b>\$1,762.38</b>    |                                                                   |                                                |          |      |       |                                                                                                                                                                                  |
| Manipulation                               |             |                          |                      |                                                                   |                                                |          |      |       |                                                                                                                                                                                  |
| Manifold block                             | 2           | 15.16                    | \$30.32              | <a href="http://Clippard.com">Clippard.com</a>                    | M-E10M-02                                      | *        |      |       |                                                                                                                                                                                  |
| Solenoid valve                             | 4           | \$24.68                  | \$98.72              | <a href="http://Clippard.com">Clippard.com</a>                    | E210C-2W012                                    | *        |      |       |                                                                                                                                                                                  |
| Tubing                                     | 50          | \$0.21                   | \$10.50              | <a href="http://McMaster.com">McMaster.com</a>                    | 50315K68 - 25' red, 25' blue                   | *        |      |       |                                                                                                                                                                                  |
| Tube fittings                              | 10          | \$2.58                   | \$25.80              | <a href="http://McMaster.com">McMaster.com</a>                    | 7880T389 - Nickel-plated brass                 | *        |      |       |                                                                                                                                                                                  |
| Object manipulator manifold                | 1           | varies                   |                      | Machined                                                          |                                                | *        |      |       | <a href="http://eMachineShop.com">eMachineShop.com</a> or 3d printed                                                                                                             |
| Organism manipulator manifold              | 1           | varies                   |                      | Machined                                                          |                                                | *        |      |       | <a href="http://eMachineShop.com">eMachineShop.com</a> or 3d printed                                                                                                             |
| Vacuum cup                                 | 1           | \$6.25                   | \$6.25               | <a href="http://McMaster.com">McMaster.com</a>                    | 5427A628 - 1/8 NPT, Male                       | *        |      |       |                                                                                                                                                                                  |
| Luer lock fitting                          | 1           | \$5.24                   | \$5.24               | <a href="http://McMaster.com">McMaster.com</a>                    | 51525K23 - Impact resistant                    | *        |      |       |                                                                                                                                                                                  |
| Organism manipulator switch holder         | 1           |                          | \$0.00               | 3d printed                                                        |                                                | *        |      |       | <a href="http://Shapeways.com">Shapeways.com</a>                                                                                                                                 |
| Fly needle                                 | 1           | \$3.41                   | \$3.41               | <a href="http://McMaster.com">McMaster.com</a>                    | 6710A61                                        | *        |      |       |                                                                                                                                                                                  |
| 0.042" dispenser needle                    | 1           | \$12.18                  | \$12.18              | <a href="http://McMaster.com">McMaster.com</a>                    | 75165A553                                      | *        |      |       |                                                                                                                                                                                  |
| 0.028" dispenser needle                    | 1           | \$12.15                  | \$12.15              | <a href="http://McMaster.com">McMaster.com</a>                    | 75165A682                                      | *        |      |       |                                                                                                                                                                                  |
|                                            |             | <b>Subtotal:</b>         | <b>\$204.57</b>      |                                                                   |                                                |          |      |       |                                                                                                                                                                                  |
| Electronics                                |             |                          |                      |                                                                   |                                                |          |      |       |                                                                                                                                                                                  |
| SmoothieBoard                              | 1           | \$162.97                 | \$162.97             | <a href="https://shop.uberclon.com">https://shop.uberclon.com</a> | Smoothieboard 5x-xM                            | *        |      |       |                                                                                                                                                                                  |
| Smoothie USB cable                         | 1           | \$4.99                   | \$4.99               | <a href="http://Amazon.com">Amazon.com</a>                        | B00NH11K1K                                     | *        |      |       |                                                                                                                                                                                  |
| Camera USB cable                           | 1           | \$9.99                   | \$9.99               | <a href="http://Amazon.com">Amazon.com</a>                        | B00HNF00S8                                     | *        |      |       |                                                                                                                                                                                  |

| MAPLE Fly-Handling Robot Bill of Materials |                |                                            |                         |                                                                |                                                                                                     |      |                                                                                        |                                                  |  |
|--------------------------------------------|----------------|--------------------------------------------|-------------------------|----------------------------------------------------------------|-----------------------------------------------------------------------------------------------------|------|----------------------------------------------------------------------------------------|--------------------------------------------------|--|
| Last updated: 12/3/2017                    |                |                                            |                         |                                                                |                                                                                                     |      |                                                                                        |                                                  |  |
|                                            | Color code:    | Off-the-shelf<br>Customized<br>Alt. source | 3d-printed<br>Laser cut | Waterjet<br>Machined                                           |                                                                                                     |      |                                                                                        |                                                  |  |
| Qty                                        | Price          | Ext. Price                                 | Source                  | Part #                                                         | X/Y only                                                                                            | LLT? | Notes                                                                                  | Alternate source                                 |  |
| Ribbon breakout PCB                        | 1              | \$29.15                                    | \$29.15                 | OSHPark.com                                                    | <a href="https://oshpark.com/shared_projects/rHsVOK">https://oshpark.com/shared_projects/rHsVOK</a> |      | These two PCBs are custom, but can be ordered from OSHPark.                            |                                                  |  |
| Smoothieboard ribbon PCB                   | 1              | \$109.00                                   | \$109.00                | OSHPark.com                                                    | <a href="https://oshpark.com/shared_projects/TI6vEC">https://oshpark.com/shared_projects/TI6vEC</a> |      | Unfortunately, OSHPark.com will only build PCBs in quantities that are multiples of 3. |                                                  |  |
| Electronics components                     | see next sheet |                                            | \$111.62                |                                                                |                                                                                                     |      |                                                                                        |                                                  |  |
|                                            |                | <b>Subtotal:</b>                           | \$427.72                |                                                                |                                                                                                     |      |                                                                                        |                                                  |  |
| <b>Vision</b>                              |                |                                            |                         |                                                                |                                                                                                     |      |                                                                                        |                                                  |  |
| Camera mount                               | 1              |                                            | \$0.00                  | 3d printed                                                     |                                                                                                     |      |                                                                                        |                                                  |  |
| Camera                                     | 1              | \$359.00                                   | \$359.00                | <a href="http://TheImagingSource.com">TheImagingSource.com</a> | DFM 72BUC02-ML                                                                                      |      | Y                                                                                      | <a href="http://Shapeways.com">Shapeways.com</a> |  |
| Lens holder                                | 1              | \$16.80                                    | \$16.80                 | <a href="http://TheImagingSource.com">TheImagingSource.com</a> | TLH 10-2                                                                                            |      |                                                                                        |                                                  |  |
| Lens                                       | 1              | \$28.00                                    | \$28.00                 | <a href="http://TheImagingSource.com">TheImagingSource.com</a> | TBL 9.6-2 C 3MP                                                                                     |      |                                                                                        |                                                  |  |
| LED ring                                   | 1              | \$9.80                                     | \$9.80                  | <a href="http://Amazon.com">Amazon.com</a>                     | B00MJSJFPW                                                                                          |      |                                                                                        |                                                  |  |
|                                            |                | <b>Subtotal:</b>                           | \$413.60                |                                                                |                                                                                                     |      |                                                                                        |                                                  |  |
| <b>Fasteners &amp; Misc. HW</b>            |                |                                            |                         |                                                                |                                                                                                     |      |                                                                                        |                                                  |  |
| Nuts for extrusion                         | 2              | \$19.32                                    | \$38.64                 | <a href="http://us.misumi-ec.com">http://us.misumi-ec.com</a>  | HNKK5-5                                                                                             |      | *                                                                                      |                                                  |  |
| Post-assy extrusion nuts, M5               | 1              | \$29.70                                    | \$29.70                 | <a href="http://us.misumi-ec.com">http://us.misumi-ec.com</a>  | PACK-HNTASN5-5                                                                                      |      | *                                                                                      |                                                  |  |
| M6 x 16 round head hex screw               | 1              | \$5.57                                     | \$5.57                  | <a href="http://McMaster.com">McMaster.com</a>                 | 92095A238                                                                                           |      | *                                                                                      |                                                  |  |
| M5 x 10 SHCS                               | 2              | \$8.15                                     | \$16.30                 | <a href="http://McMaster.com">McMaster.com</a>                 | 91292A124                                                                                           |      | *                                                                                      |                                                  |  |
| M5 x 6 SHCS                                | 2              | \$4.63                                     | \$9.26                  | <a href="http://McMaster.com">McMaster.com</a>                 | 91292A189                                                                                           |      | *                                                                                      |                                                  |  |
| M5 x 20 SHCS                               | 4              |                                            |                         |                                                                |                                                                                                     |      | *                                                                                      |                                                  |  |
| M5 x 25 shoulder bolt                      | 4              | \$5.53                                     | \$22.12                 | <a href="http://McMaster.com">McMaster.com</a>                 | 90265A145                                                                                           |      | *                                                                                      |                                                  |  |
| M5 x 20 shoulder bolt                      | 4              | \$5.22                                     | \$20.88                 | <a href="http://McMaster.com">McMaster.com</a>                 | 90269A144                                                                                           |      | *                                                                                      |                                                  |  |
| M3 x 25 SHCS                               | 1              | \$6.40                                     | \$6.40                  | <a href="http://McMaster.com">McMaster.com</a>                 | 91292A020                                                                                           |      | *                                                                                      |                                                  |  |
| M3 x 20 mm threaded rod                    | 1              | \$7.33                                     | \$7.33                  | <a href="http://McMaster.com">McMaster.com</a>                 | 93805A631                                                                                           |      | *                                                                                      |                                                  |  |
| M3 x 20 SHCS                               | 1              | \$6.00                                     | \$6.00                  | <a href="http://McMaster.com">McMaster.com</a>                 | 91292A123                                                                                           |      | *                                                                                      |                                                  |  |
| M3 x 14 low profile screw                  | 2              | \$5.80                                     | \$11.60                 | <a href="http://McMaster.com">McMaster.com</a>                 | 92095A168                                                                                           |      | *                                                                                      |                                                  |  |
| M3 x 12 SHCS                               | 1              | \$4.40                                     | \$4.40                  | <a href="http://McMaster.com">McMaster.com</a>                 | 91292A114                                                                                           |      | *                                                                                      |                                                  |  |
| M3 x 8 SHCS                                | 1              | \$4.00                                     | \$4.00                  | <a href="http://McMaster.com">McMaster.com</a>                 | 91292A112                                                                                           |      | *                                                                                      |                                                  |  |
| M3 washer                                  | 1              | \$1.62                                     | \$1.62                  | <a href="http://McMaster.com">McMaster.com</a>                 | 93475A210                                                                                           |      | *                                                                                      |                                                  |  |
| M3 nut                                     | 1              | \$5.55                                     | \$5.55                  | <a href="http://McMaster.com">McMaster.com</a>                 | 91828A211                                                                                           |      | *                                                                                      |                                                  |  |
| M2 x 8mm pan head screw                    | 1              | \$4.52                                     | \$4.52                  | <a href="http://McMaster.com">McMaster.com</a>                 | 92000A015                                                                                           |      | *                                                                                      |                                                  |  |
| M2.63 x 12mm for plastics                  | 1              | \$14.33                                    | \$14.33                 | <a href="http://McMaster.com">McMaster.com</a>                 | 99397A356                                                                                           |      | *                                                                                      |                                                  |  |
| M1.91 x 12mm for plastics                  | 1              | 11.66                                      | \$11.66                 | <a href="http://McMaster.com">McMaster.com</a>                 | 99397A077                                                                                           |      | *                                                                                      |                                                  |  |
| Zip tie mount                              | 1              | 8.53                                       | \$8.53                  | <a href="http://McMaster.com">McMaster.com</a>                 | 7582K11                                                                                             |      | *                                                                                      |                                                  |  |
| Spacer for camera                          | 1              | 7.77                                       | \$7.77                  | <a href="http://McMaster.com">McMaster.com</a>                 | 94639A464                                                                                           |      | *                                                                                      |                                                  |  |
| M2.5 x 10mm SHCS                           | 1              | 4.94                                       | \$4.94                  | <a href="http://McMaster.com">McMaster.com</a>                 | 91292A014                                                                                           |      | *                                                                                      |                                                  |  |
| M3 x 12 mm Shoulder screw                  | 2              | 2.66                                       | \$5.32                  | <a href="http://McMaster.com">McMaster.com</a>                 | 90265A122                                                                                           |      | *                                                                                      |                                                  |  |
| M3 spacers for PCBs                        | 10             | 0.48                                       | \$4.80                  | <a href="http://McMaster.com">McMaster.com</a>                 | 95947A008                                                                                           |      | *                                                                                      |                                                  |  |
| M5 flat washer                             | 1              | 2.57                                       | \$2.57                  | <a href="http://McMaster.com">McMaster.com</a>                 | 93475A240                                                                                           |      | *                                                                                      |                                                  |  |
| M5 nyloc nut                               | 1              | 5.98                                       | \$5.98                  | <a href="http://McMaster.com">McMaster.com</a>                 | 93625A200                                                                                           |      | *                                                                                      |                                                  |  |
|                                            |                | <b>Subtotal:</b>                           | \$259.79                |                                                                |                                                                                                     |      |                                                                                        |                                                  |  |
| <b>Tools &amp; Consumables</b>             |                |                                            |                         |                                                                |                                                                                                     |      |                                                                                        |                                                  |  |
| Epoxy                                      | 1              | \$54.96                                    | \$54.96                 | <a href="http://McMaster.com">McMaster.com</a>                 | 75045A65                                                                                            |      | *                                                                                      |                                                  |  |
| M5 x 0.8 tap                               | 1              | \$6.67                                     | \$6.67                  | <a href="http://McMaster.com">McMaster.com</a>                 | 8305A16                                                                                             |      | *                                                                                      |                                                  |  |
| 1/4-28 tap                                 | 1              | 5.35                                       | \$5.35                  | <a href="http://McMaster.com">McMaster.com</a>                 | 2521A681                                                                                            |      | *                                                                                      |                                                  |  |
| M3 x 0.5 tap                               | 1              | 6.09                                       | \$6.09                  | <a href="http://McMaster.com">McMaster.com</a>                 | 8305A12                                                                                             |      | *                                                                                      |                                                  |  |
| M2.5 x 0.45 tap                            | 1              | 9.59                                       | \$9.59                  | <a href="http://McMaster.com">McMaster.com</a>                 | 8305A11                                                                                             |      | *                                                                                      |                                                  |  |
| Letter O drill bit                         | 1              | 3.84                                       | \$3.84                  | <a href="http://McMaster.com">McMaster.com</a>                 | 30595A446                                                                                           |      | *                                                                                      |                                                  |  |
|                                            |                | <b>Subtotal:</b>                           | \$88.50                 |                                                                |                                                                                                     |      |                                                                                        |                                                  |  |
|                                            |                | <b>Total Parts Cost:</b>                   | <b>\$3,495.80</b>       |                                                                |                                                                                                     |      |                                                                                        |                                                  |  |
